# Supplementary material for: Detection of Multiple Innervation Zones from Multi-Channel Surface EMG Recordings with Low Signal-to-Noise Ratio Using Graph-Cut Segmentation
Source: PubMed Central journal article supplement (PMC5158322; doi:10.1371/journal.pone.0167954), 2016-12-15
Supplement: pone.0167954.s001.pdf [file pone.0167954.s001.pdf]

# 1 Appendix I: Image segmentation using kernel Graph-Cut

2

## 3 Image Segmentation

4

5 A word image is used to describe a wide range of two-dimensional sensation of environment.  
6 These images may be captured by optical devices or natural object and phenomena. In computer, an  
7 image is represented numerically to display, analyze and store. In each dimension, there is a fixed number  
8 of pixels and each pixel contains a value that represents intensity (gray-scale image) or color (color  
9 image) of its location in the image [1].

10

11 In an image, there are different objects; each of which has its own area representing their nature.  
12 We may focus on a specific part of the image, based on what is required from an image. As an example, a  
13 computed tomography image contains different organs. When a specific organ, located in a specific  
14 region in the image, is needed to analyze, the related region must be extracted. Thus, segmenting an  
15 image into the sub-set of regions, it is possible to better analyze such regions in details [1].

16

17 A region is defined as a group of pixels having similar border and a specific shape like circle. The  
18 term image segmentation is referred to as the partitioning of an image into a set of regions covering it.  
19 When the regions of interest do not cover the whole image, the segmentation is used to decompose the  
20 image into foreground regions of interest and background regions to be ignored. In our problem, the  
21 segmentation of an image frame results in different propagation regions and noise areas. The former, will  
22 be enhanced and later is suppressed using morphological signal processing discussed in the Appendix 2.

1 Usually, segmentation has two objectives. One of which is to decompose the image into parts for  
2 further analysis, while the other aim is to perform a change of representation by increasing the efficiency  
3 of underlying regions. Such regions must be uniform and homogeneous whose interiors do not have many  
4 small holes and boundaries are smooth. Here we focus on gray scale images where the pixels contain the  
5 intensity values.

6

## 7 Clustering

8

9 A common cost (objective) function, minimized through clustering, is formed based on the least  
10 squares error measure:

$$11 \quad D = \sum_{k=1}^K \sum_{x_i \in C_k} \|x_i - m_k\|^2 \quad (1)$$

12 where  $K$  is the number of clusters  $\{C_1, \dots, C_K\}$ ,  $m_k$  is the representative of the cluster no.  $k$  (e.g. the  
13 average of the values of the samples in that cluster), and  $D$  is the cost function. Overall, it measures how  
14 the data are close to their assigned clusters. In most of the algorithms, the parameter  $K$  is set i.e. different  
15 number of clusters are tested and the optimal number is estimated based on some criteria. When this  
16 method is applied for image segmentation, connected component labeling is further used to find  
17 connected regions in each segment.

18 Different clustering methods such as K-means were proposed in the literature based on the  
19 minimization of the above cost function. Such algorithms, are iterative and the do not guarantee to find  
20 the global minimum of the cost function. In fact, there are many methods proposed in the literature for  
21 image segmentation (**Figure A1-1**) [2].

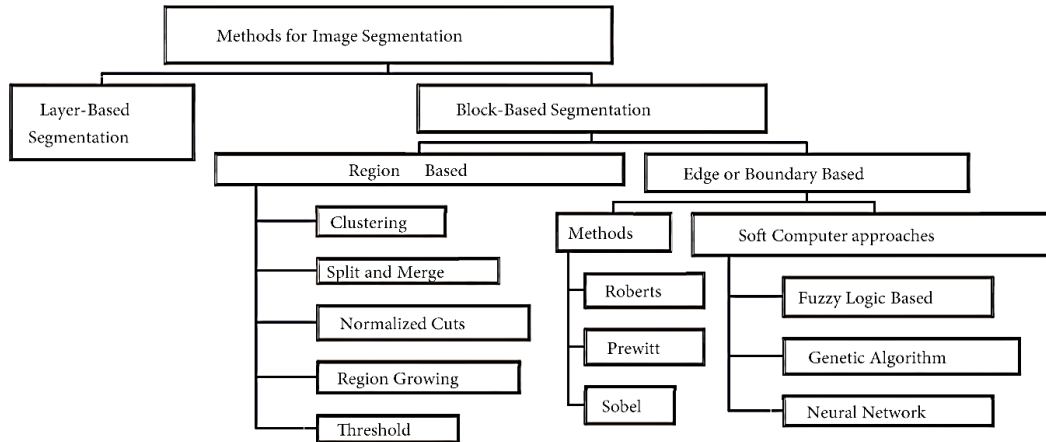

**Figure A1-1:** Methods for image segmentation (reproduced from [2] with permission)

Graph-cut segmentation, is one of the categories of normalized cuts in which the segmentation is based on the discontinuities in the image. This method, aimed at optimal splitting by reducing the number of regions. It is based on the graph theory in which each pixel is a vertex and edges link nearby pixels (4-connectivity) [2]. Proper image segmentation, implies defining right partition cost function and incorporating an efficient optimization algorithm. The former issue is discussed first and the energy cost function is introduced. The solution of this optimization is then provided by using the graph theory.

### The energy (cost) function

For segmenting the input gray-scale image  $I$  (that has the pixel set  $\Gamma$ ) into maximum  $G$  regions, the label of each pixel  $l \leq G$  must be provided. Each region  $\{R_l\}_{l=1}^G$  is thus defined as a set of pixels with the same label. The mapping function that indicates the label of each pixel is shown as  $\lambda$ .

In computer vision, the segmentation is usually performed via minimizing an energy function ( $F$ ) [3, 4]. The energy function ( $F$ ) can then be written as:

$$1 \quad F(\lambda) = D(\lambda) + \gamma R(\lambda) \quad (2)$$

2 where  $D$  measures the disagreement between the segment representative intensity and the intensity  
3 of the pixels in each segment (Equation 3) i.e. similar to the objective or cost function of a classic  
4 clustering algorithm shown in Equation 1),  $R$  is the penalty function for extracted segments that are not  
5 smooth. Briefly, it measures how different the intensities of pixels are from each other in each segment.  
6 This could be estimated based on the sum of the squared difference of each pairs of pixels intensity in  
7 each segment. The constant  $\gamma$  is a positive regularized coefficient that controls relative importance of the  
8 first and second terms [5].

$$9 \quad D(\lambda) = \sum_{l \in \Gamma} \sum_{p \in R_l} (\mu_l - I_p)^2 \quad (3)$$

10 where  $\mu_l$  is the intensity representative of  $R_l$  (e.g. the average of the intensity values of the pixels in  
11 segment  $l$ ). The cost function shown in Equation 2 could also be minimized by the transformation of the  
12 first term of Equation (2) to higher dimensions where the nonlinearity of the problem is reduced [6]. The  
13 kernel induced segmentation function could be defined as the following:

$$14 \quad F_K(\{\mu_l\}, \lambda) = \sum_{l \in \Gamma} \sum_{p \in R_l} (K(I_p, I_p) + K(\mu_l, \mu_l) - 2K(I_p, \mu_l)) + \gamma R(\lambda) \quad (4)$$

15 Where  $K$  is the Radial basis Function (RBF) defined as  $K(X, Y) = \exp(-\|X - Y\|^2 / \sigma^2)$  where  $\sigma$  was  
16 set to 0.5 in our study. Transforming the data to the higher dimension is used in the literature in different  
17 applications.

18

## 19 Graph Cut

20

21 The cost function mentioned in equation (4) is minimized with an iterative two-step optimization  
22 strategy. The procedure is similar to other partitioning clustering (such as K-means). First, the labels are

1 fixed and the intensity of segments' representatives  $\{u_1, \dots, u_G\}$  is estimated using the gradient descent  
2 algorithm[6]. Second, the optimal labeling is determined by using the graph-cut algorithm. The algorithm  
3 iterates these two steps until convergence.

4 Let  $\mathcal{G} = \langle \mathcal{V}, \mathcal{E} \rangle$  be a weighted graph where  $\mathcal{V}$  is the set of vertices (i.e. pixels) and  $\mathcal{E}$  is the set of  
5 edges linking nearby pixels (i.e. connection with up, down, right and left pixels). There are also two  
6 additional distinguished vertices in  $\mathcal{V}$  known as terminals (source: "S" and sink "T"). A cut  $\zeta \subset \mathcal{E}$  is  
7 defined as a partition of vertices into two disjoint subsets in the induced graph  $\mathcal{G}(\zeta)$  where terminals are  
8 separated in the graph [5, 7] (**Figure A1-2**). This cut is also minimal, in a sense that that none of its  
9 subsets separates the terminals into the same two sub graphs.

10 The cost of the cut  $\zeta$  is defined as the sum of its edges weights (or capacity). The problem is to find  
11 the cut with smallest cost. By setting the weight of graph  $\mathcal{G}$  based on the information of the pixels in the  
12 image, the minimum cost cuts corresponds with the minimum of the energy function. The calculation of  
13 the graph weights based on the image information is straight forward [6, 8]. Unlike other partition method  
14 where the image is first segmented into background and foreground images and the procedure continuous  
15 until no further segment is found. The method used in our study is capable of the identification of  
16 multiple regions simultaneously. This method improves the boundary of identified segments in each  
17 iteration (**Figure A1-3**).

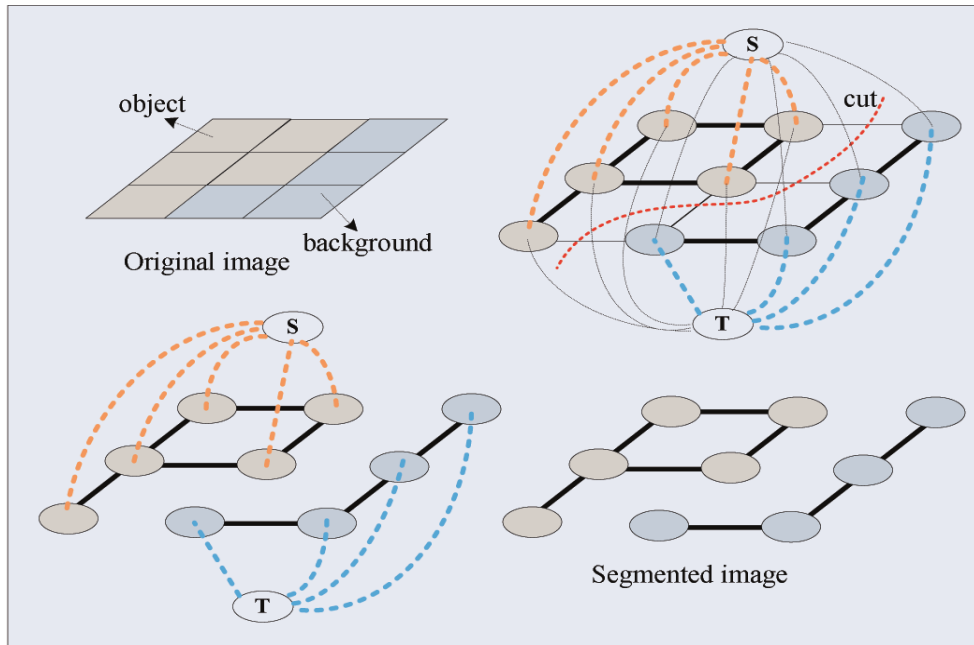

1

2 **Figure A1-2:** Illustration of graph cut for image segmentation. The cut is corresponding to the minimal energy of  
 3 Equation 4. "S" and "T" are the terminal vertices source and sink, respectively (reproduced from [2] with  
 4 permission).

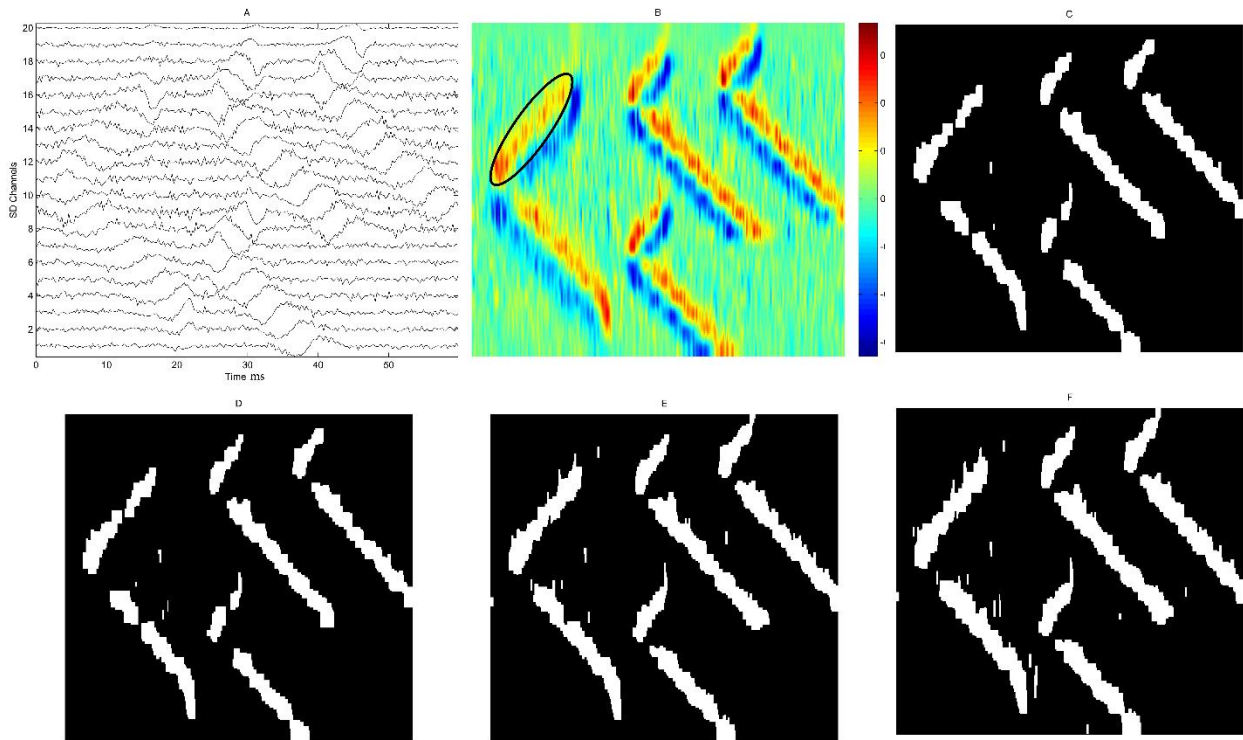

5

1 **Figure A1-3:** Kernel graph cut procedure for segment image. A) The original surface electromyographic signals  
2 (SNR 5dB); B) The transformed image using bi-cubic interpolation (factor of 10). The segmentation is performed in  
3 the positive swings in this figure (a sample region was marked by a black oval); the first, second, third and fourth  
4 iterations are shown in B-F. The boundaries of the identified segments are improved at each iteration.

5

## 6 References

7

- 8 1. Shapiro, L.G. and A. Rosenfeld, *Computer vision and image processing*. 1992, Boston: Academic  
9 Press. xiv, 623 p.
- 10 2. Zaitoun, N.M. and M.J. Aqel, *Survey on Image Segmentation Techniques*. *Procedia Computer*  
11 *Science*, 2015. **65**: p. 797-806.
- 12 3. Hofmann, T., J. Puzicha, and J.M. Buhmann, *Unsupervised texture segmentation in a*  
13 *deterministic annealing framework*. *Pattern Analysis and Machine Intelligence, IEEE Transactions*  
14 *on*, 1998. **20**(8): p. 803-818.
- 15 4. Poggio, T., V. Torre, and C. Koch, *Computational vision and regularization theory*. *Nature*, 1985.  
16 **317**(6035): p. 314-319.
- 17 5. Veksler, O., *Efficient Graph-Based Energy Minimization Methods in Computer Vision*. 1999,  
18 Cornell University.
- 19 6. Salah, M.B., A. Mitiche, and I.B. Ayed, *Multiregion Image Segmentation by Parametric Kernel*  
20 *Graph Cuts*. *Image Processing, IEEE Transactions on*, 2011. **20**(2): p. 545-557.
- 21 7. Salah, M.B., A. Mitiche, and I.B. Ayed, *Multiregion image segmentation by parametric kernel*  
22 *graph cuts*. *IEEE Transactions on Image Processing*, 2011. **20**(2): p. 545-557.
- 23 8. Boykov, Y.Y. and M.-P. Jolly. *Interactive graph cuts for optimal boundary & region segmentation*  
24 *of objects in ND images*. in *Computer Vision, 2001. ICCV 2001. Proceedings. Eighth IEEE*  
25 *International Conference on*. 2001. IEEE.

26
